# Supplementary material
Source: PubMed Central journal article supplement (PMC3087457)
Supplement: supp_10-0859_Online_Supplement.pdf [file supp_10-0859_Online_Supplement.pdf]

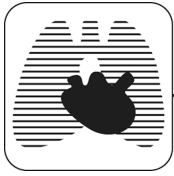

## Number of Lymph Nodes Harvested From a Mediastinal Lymphadenectomy

### Results of the Randomized, Prospective American College of Surgeons Oncology Group Z0030 Trial

*Gail E. Darling, MD; Mark S. Allen, MD; Paul A. Decker, MS; Karla Ballman, PhD; Richard A. Malthaner, MD; Richard I. Inculet, MD; David R. Jones, MD, FCCP; Robert J. McKenna, MD, FCCP; Rodney J. Landreneau, MD; and Joe B. Putnam Jr, MD, FCCP*

#### **e-Appendix 1.**

American College of Surgeons Oncology Z0030 Trial Group - Abramson Cancer Center of the University of Pennsylvania; Shrager, Joseph B.; Allegheny Cancer Center Network, Keenan, Robert J., Landreneau, Rodney J.; Beth Israel Deaconess Medical Center Boston MA, LoCicero, Joseph, Thurer, Robert Lee; Beth Israel Medical Center New York NY, Keller, Steven M.; Bethesda North Hospital, Buckley, Donald C.; Cedars-Sinai Medical Center, McKenna, Robert J.; Central Baptist Hospital; Creighton University Medical Center, Scott, Walter J. Veterans Affairs Medical Center, Mitchell, John D.; Edward Hospital, Bleck, Phyllis C.; Englewood Hospital and Medical Center: Fox Chase Cancer Center, Goldberg, Melvyn, Scott, Walter J.; Good Samaritan Hospital (Cincinnati), Smith, J. Michael; Holmes Regional Medical Center, Greene, Michael A., Malias, Mark A.; Huntington Memorial Hospital, Cohen, Robbin G., Jameson Hospital, Landreneau, Rodney J.; Jewish Hospital, Bowling, Roy G.; Lankenau Medical Research Center, Carp, Ned Z.; Latter Day Saints Hospital, Collins, Michael P.; Lenoir Memorial Hospital, Whitlark, Joseph D.; London Health Sciences Centre (Univ of Western Ontario Med Ctr), Inculet, Richard I., Malthaner, Richard A.; Loyola University Medical Center, Vigneswaran, Wickii T.; M.D. Anderson Cancer Center (Univ of Texas), Putnam, Joe B., Rice, David Christopher, Roth, Jack A., Vaporciyan, Ara A.; Mary Imogene Bassett Hospital, Ryan, M. Bernadette; Massachusetts General Hospital, Gaissert, Henning A.; Mayo Clinic (Rochester), Allen, Mark S., Deschamps, Claude, Miller, Daniel L., Nichols, Francis C.; Medical Center of Central Georgia; Medical Center of Southwest Louisiana, Lirtzman, Mitchell D.; Medical College of Virginia Hospital (Virginia Commonwealth Univ), Cohen, Neri M.; Memorial Medical Center (Southern Illinois Univ School of Medicine), Hazelrigg, Stephen R.; Memorial Sloan-Kettering Cancer Center, Bains, Manjit S., Rusch, Valerie W. Robert J. Downey, Robert J. Ginsberg ; Mobile Infirmiry Medical Center, Bradley Scott, Walker, Gaylord T.; New York Hospital - Cornell University Medical Center, Altorki, Nasser

*Online supplements are not copyedited prior to posting.*

1

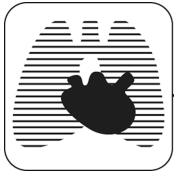

K., Port, Jeffrey L.; Omaha Veterans Administration Medical Center, Scott, Walter J.; Peter MacCallum Cancer Institute, Wright, Gavin M.; Providence Portland Medical Center, Douville, Emery Charles, Handy, John R., Ott, Gary Yee, Tsen, Andrew C.; Rhode Island Hospital, Gaissert, Henning A.; Roswell Park Cancer Institute, Anderson, Timothy M., Demmy, Todd L., Nwogu, Chukwumere E.; Saint Clair Hospital, Landreneau, Rodney J., Saint John's Hospital, Hazelrigg, Stephen R.; Saint Luke's Hospital of Duluth, Streitz, John M.; Saint Thomas Hospital (Nashville), Nesbitt, Jonathan C.; Saint Vincent Hospital (Green Bay), Coleman, Edward J.; Saint Vincent's Hospital, Melbourne, Wright, Gavin M.; Stanford University (Hospital), Whyte, Richard I.; Stony Brook University Hospital; Thomas Jefferson University Hospital, Pechet, Taine T.; Toronto General Hospital, Darling, Gail E., Johnston, Michael R., Keshavjee, Shafique, Pierre, Andrew F., Waddell, Thomas K.; Trinity Cancer Care Center (Minot), Rothberg, Martin L.; University of California San Francisco Medical Center (Long-Moffitt), Jablons, David M.; University of California, Irvine, Milliken, Jeffrey C.; University of Chicago (Hospitals), Ferguson, Mark K.; University of Cincinnati Medical Center, Howington, John A., Reed, Michael F.; University of Miami, Katariya, Kushagra, Thurer, Richard J.; University of Missouri - Ellis Fischel, Demmy, Todd L.; University of Pittsburgh - Presbyterian Hospital, Buenaventura, Percival O., Keenan, Robert J., Landreneau, Rodney J., Luketich, James D.; University of Pittsburgh (Shadyside Hospital), Christie, Neil A., Landreneau, Rodney J., Luketich, James D.; University of Pittsburgh Medical Center-St. Margaret Hospital, Landreneau, Rodney J.; University of Rochester (Medical Center), Feins, Richard H., Johnstone, David W., Watson, Thomas J.; University of South Alabama, LoCicero, Joseph; University of Virginia (Medical Center), Daniel, Thomas M., Jones, David R.; University of Washington Medical Center, Vallieres, Eric, Wood, Douglas E.; University of Wisconsin, Weigel, Tracey L.; Upstate Medical University (SUNY-Upstate Syracuse), Dexter, Elizabeth U., Kohman, Leslie J.; VA Medical Center - Cincinnati, Howington, John A., Reed, Michael F.; Valley Hospital, Lee, Youngick, Tsoukas, Elias N.; Veterans Administration Center, Seattle (Puget Sound), Vallieres, Eric; Veterans Administration Medical Center - Minneapolis, Kelly, Rosemary F.; Washington University (Barnes Jewish Hospital), Battafarano, Richard J., Cooper, Joel D., Meyers, Bryan F., Patterson, G. Alexander; West Virginia University (Mary Babb Randolph Cancer Center), Graeber, Geoffrey M.; Western Pennsylvania Hospital, Keenan, Robert J., Landreneau, Rodney J.; Westmoreland Hospital, Keenan, Robert J., Landreneau, Rodney J.; William Beaumont Hospital (Royal Oak), Chmielewski, Gary W.

*Online supplements are not copyedited prior to posting.*

2
